# Supplementary material
Source: publisher figshare collection journal article supplement (https://acs.figshare.com/ndownloader/files/3791164)
Supplement: Supplementary file 1 [file 3791164]

# Supplemental material

## Enhancement Mechanism of the Conversion Efficiency of Dye-Sensitized Solar Cells Based on N, F, and I-Doped TiO<sub>2</sub> Photoanodes

Mang Niu<sup>a</sup>, Rong Cui<sup>b</sup>, Hao Wu<sup>b</sup>, Daojian Cheng<sup>a,b,\*</sup>, and Dapeng Cao<sup>a,c\*</sup>

<sup>a</sup>*State Key Laboratory of Organic-Inorganic Composites, Beijing University of  
Chemical Technology, Beijing 100029, People's Republic of China*

<sup>b</sup>*Changzhou Institute of Advanced Materials, Beijing University of Chemical  
Technology, Changzhou 213164, P. R. China*

<sup>c</sup>*International Research Center for Soft Matter, Beijing University of Chemical  
Technology, Beijing 100029, People's Republic of China*

---

\* Authors to whom correspondence should be addressed. Electronic addresses: [chengdj@mail.buct.edu.cn](mailto:chengdj@mail.buct.edu.cn) and [caodp@mail.buct.edu.cn](mailto:caodp@mail.buct.edu.cn) Fax: +8610-64427616

## **1. The structural properties of N, F and I doped anatase TiO<sub>2</sub>.**

Figure S1 shows the anatase supercell models of N, F and I doped anatase TiO<sub>2</sub>. The incorporated N and F atoms substituted the X1 and X2 O sites, whereas the I dopants substituted the Y1 and Y2 Ti sites of anatase TiO<sub>2</sub>. In the geometry optimization, both the lattice constant and the ions position were allowed to be relaxed. The optimized lattice constants of N, F and I doped anatase TiO<sub>2</sub> were listed in Table S1. It is found that the lattice constants of I doped anatase TiO<sub>2</sub> are larger than that of pure anatase TiO<sub>2</sub>. The increase of lattice constants can attribute to the larger atom radius of I than that of Ti.

## **2. The DOSs of N, F and I doped anatase TiO<sub>2</sub>.**

Figure S2(a) shows that the incorporation of N dopants in anatase TiO<sub>2</sub> induces partially occupied N-2p impurity states above the VBM. The HSE06 calculated band gaps of N doped TiO<sub>2</sub> are 3.142 and 3.013 eV for the low and high N doping concentrations, respectively. Therefore, N doping in TiO<sub>2</sub> can improve the visible-light absorption of TiO<sub>2</sub> but shows minor effect on the band gap reduction. The DOSs plots of F doped anatase TiO<sub>2</sub> indicate that most F-2p states are localized in the lower-energy range of the valence band and do not induce impurity states in the band gap [see Figure S2(b)]. The HSE06 calculated band gaps of F doped TiO<sub>2</sub> are 3.101 and 3.094 eV for the low and high F doping concentrations, respectively. Thus, F doping is not a good choice for extending the optical absorption edge of TiO<sub>2</sub> into the visible-light region. As shown in Figure S2(c), I doping in TiO<sub>2</sub> introduce a fully

occupied band gap state about 1.0 eV above the VBM and thus lead to an effective band gap reduction of TiO<sub>2</sub>. The HSE06 calculated band gaps of I doped TiO<sub>2</sub> are 1.922 and 2.131 eV for the low and high I doping concentrations, respectively.

**Table S1** The optimized lattice constants (Å) of different kinds of anatase TiO<sub>2</sub>.

| Structure                |        | Lattice constants |          |          |
|--------------------------|--------|-------------------|----------|----------|
|                          |        | <i>a</i>          | <i>b</i> | <i>c</i> |
| Pure TiO <sub>2</sub>    |        | 3.821             | 3.821    | 9.683    |
| N doped TiO <sub>2</sub> | 3.125% | 3.818             | 3.837    | 9.688    |
|                          | 6.25%  | 3.829             | 3.832    | 9.699    |
| F doped TiO <sub>2</sub> | 3.125% | 3.837             | 3.839    | 9.640    |
|                          | 6.25%  | 3.853             | 3.856    | 9.602    |
| I doped TiO <sub>2</sub> | 6.25%  | 3.854             | 3.854    | 9.749    |
|                          | 12.5%  | 3.888             | 3.888    | 9.774    |

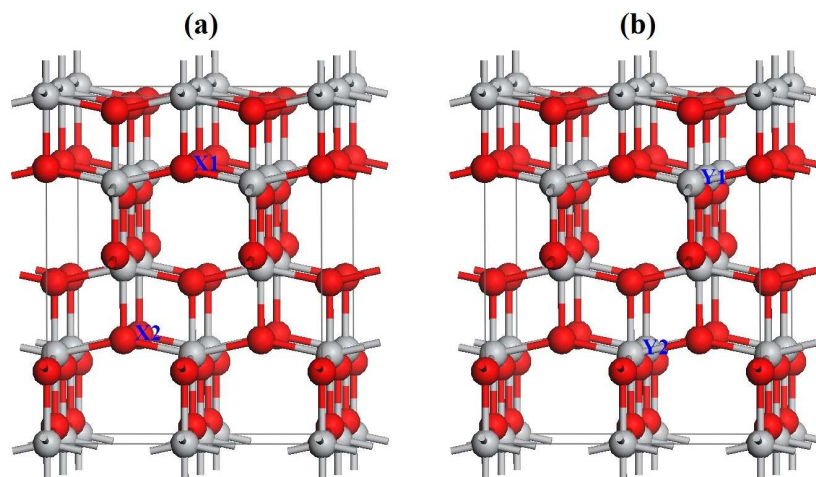

**Figure S1.** The 2×2×1 anatase TiO<sub>2</sub> supercell models used to simulate (a) N and F doped anatase TiO<sub>2</sub> and (b) I doped anatase TiO<sub>2</sub>. The red and the gray spheres represent the O and Ti atoms of TiO<sub>2</sub>, respectively. X1 (or Y1) and X1+X2 (or Y1+Y2) represent the dopant sites in the low and high doping levels, respectively.

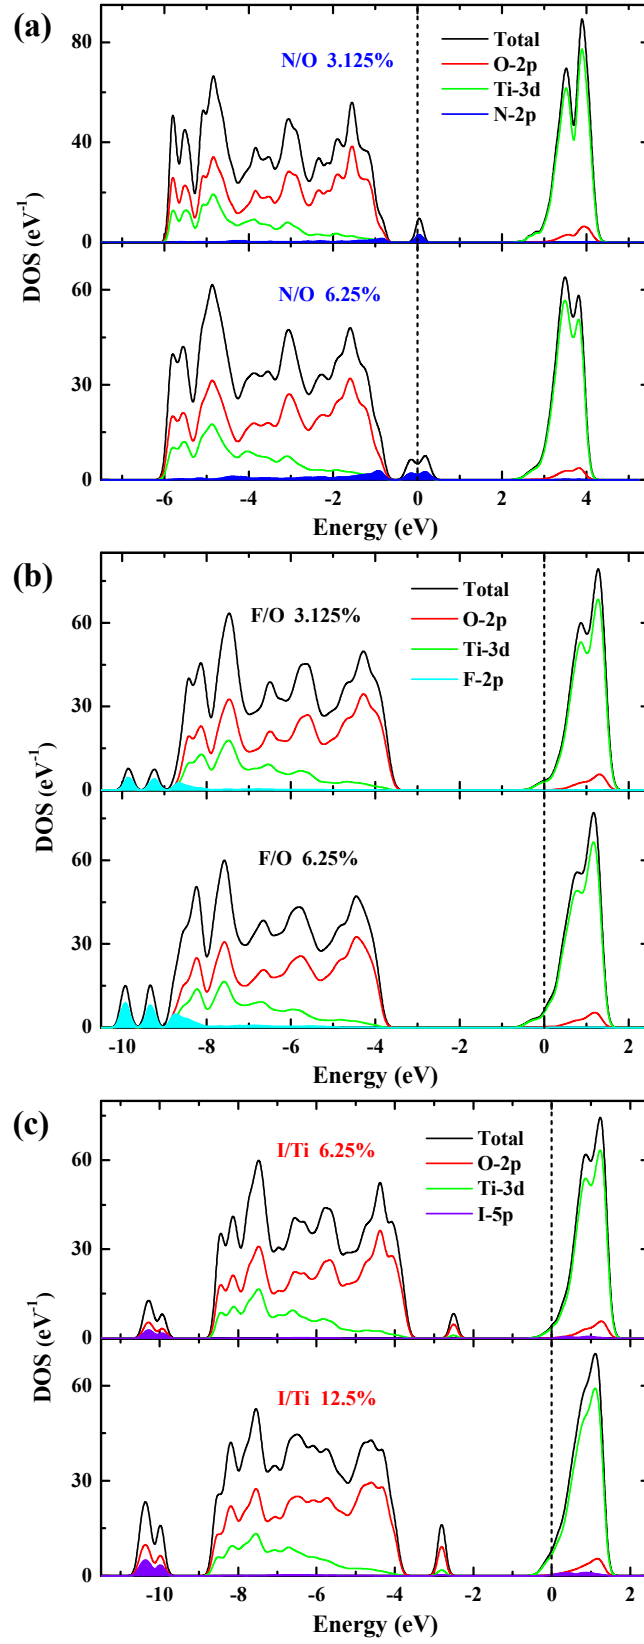

**Figure S2.** The HSE06 calculated DOSs for (a) N doped, (b) F doped, and (c) I doped anatase TiO<sub>2</sub> in the low and high doping concentration regime. The Fermi level of these systems is displayed with a black dashed line.
